# Supplementary material
Source: PubMed Central journal article supplement (PMC5367486)
Supplement: NIHMS829359-supplement-Table_1.pdf [file NIHMS829359-supplement-Table_1.pdf]

Table S1: Overview of the bacterial strains used in this study.

| Species              | Strain                | Sampling Location | IMG JGI submission ID  | Number of nodes in network |     |
|----------------------|-----------------------|-------------------|------------------------|----------------------------|-----|
| Salinispora tropica  | CNB440                | Bahamas           | 369723 (NCBI Taxon ID) | 236                        |     |
|                      | CNB476                | Bahamas           | 11057                  | 142                        |     |
|                      | CNB536                | Bahamas           | 11058                  | 63                         |     |
|                      | CNH898                | Bahamas           | 9582                   | 185                        |     |
|                      | CNR699                | Bahamas           | 11506                  | 167                        |     |
|                      | CNS197                | Bahamas           | 9689                   | 230                        |     |
|                      | CNS416                | Bahamas           | 10982                  | 102                        |     |
|                      | CNT250                | Bahamas           | 20026                  | 156                        |     |
|                      | CNT261                | Bahamas           | 14345                  | 14                         |     |
|                      | CNY912                | Bahamas           | 20025                  | 238                        |     |
|                      | CNY678                | Ozumatel          | 35127                  | 222                        |     |
|                      | CNY681                | Yucatan           | 35126                  | 29                         |     |
|                      | Salinispora arenicola | CNS458            | Bahamas                | 11056                      | 163 |
| CNS627               |                       | Bahamas           | 9591                   | 113                        |     |
| CNH643               |                       | Bahamas           | 34967                  | 27                         |     |
| CNH646               |                       | Bahamas           | 9688                   | 244                        |     |
| CNH713               |                       | Red Sea           | 37236                  | 74                         |     |
| CNH718               |                       | Red Sea           | 35123                  | 8                          |     |
| CNH877               |                       | Bahamas           | 11857                  | 111                        |     |
| CNH905               |                       | Bahamas           | 9690                   | 221                        |     |
| CNH941               |                       | Sea of Cortez     | 9700                   | 270                        |     |
| CNH962               |                       | Sea of Cortez     | 11938                  | 20                         |     |
| CNH963               |                       | Sea of Cortez     | 14299                  | 18                         |     |
| CNH964               |                       | Sea of Cortez     | 9614                   | 232                        |     |
| CNH996               |                       | Sea of Cortez     | 35122                  | 93                         |     |
| CNP105               |                       | Sea of Cortez     | 11186                  | 127                        |     |
| CNP193               |                       | Sea of Cortez     | 11186                  | 97                         |     |
| CNG148               |                       | Guam              | 9687                   | 92                         |     |
| CNG884               |                       | Guam              | 34969                  | 57                         |     |
| CNR107               |                       | Guam              | 11939                  | 189                        |     |
| CNR425               |                       | Guam              | 15067                  | 169                        |     |
| CNS021               |                       | Palau             | 9715                   | 184                        |     |
| CNS051               |                       | Palau             | 11187                  | 95                         |     |
| CNS405               |                       | Palau             | 381037 (NCBI Taxon ID) | 210                        |     |
| CNS243               |                       | Palau             | 14327                  | 84                         |     |
| CNS296               |                       | Palau             | 36410                  | 34                         |     |
| CNS299               |                       | Palau             | 14344                  | 48                         |     |
| CNS325               |                       | Palau             | 37242                  | 30                         |     |
| CNS342               |                       | Fiji              | 37324                  | 26                         |     |
| CNS673               |                       | Fiji              | 11849                  | 210                        |     |
| CNS744               |                       | Fiji              | 11188                  | 8                          |     |
| CNS820               |                       | Fiji              | 36417                  | 20                         |     |
| CNS848               |                       | Fiji              | 38495                  | 141                        |     |
| CNS991 (DSM 45545)   |                       | Fiji              | 10070                  | 192                        |     |
| CNT805               |                       | Fiji              | 10949                  | 99                         |     |
| CNT868               |                       | Fiji              | 24413                  | 68                         |     |
| CNT798               |                       | Hawaii            | 9693                   | 288                        |     |
| CNT799               |                       | Hawaii            | 14925                  | 182                        |     |
| CNT803               |                       | Hawaii            | 9575                   | 179                        |     |
| CNT848               |                       | Hawaii            | 11184                  | 100                        |     |
| CNT850               |                       | Hawaii            | 9637                   | 264                        |     |
| CNT857               |                       | Hawaii            | 9616                   | 195                        |     |
| CNT859               |                       | Hawaii            | 11088                  | 165                        |     |
| CNX481               |                       | Palmyra           | 11189                  | 85                         |     |
| CNX482               |                       | Palmyra           | 9639                   | 109                        |     |
| CNX698               |                       | Palmyra           | 9695                   | 71                         |     |
| CNX814               |                       | Palmyra           | 10870                  | 115                        |     |
| CNX891               |                       | Palmyra           | 9684                   | 189                        |     |
| CNY011               |                       | Bahamas           | 10971                  | 104                        |     |
| CNY230               |                       | Fiji              | 35133                  | 28                         |     |
| CNY231               |                       | Fiji              | 11233                  | 279                        |     |
| CNY234               |                       | Fiji              | 11840                  | 83                         |     |
| CNY237               |                       | Fiji              | 10981                  | 72                         |     |
| CNY244               |                       | Fiji              | 35129                  | 17                         |     |
| CNY256               |                       | Fiji              | 11234                  | 105                        |     |
| CNY260               |                       | Fiji              | 11235                  | 161                        |     |
| CNY280               |                       | Fiji              | 10972                  | 102                        |     |
| CNY281               |                       | Fiji              | 35121                  | 54                         |     |
| CNY282               |                       | Fiji              | 12635                  | 113                        |     |
| CNY496               |                       | Puerto Vallarta   | 35125                  | 82                         |     |
| CNY679               |                       | Yucatan           | 35131                  | 34                         |     |
| CNY685               |                       | Barco Chinchomo   | 35845                  | 69                         |     |
| CNY690               |                       | Barco Chinchomo   | 35129                  | 15                         |     |
| CNY694               |                       | Yucatan           | 35132                  | 37                         |     |
| Salinispora pacifica |                       | CNT132            | Red Sea                | 37235                      | 22  |
|                      |                       | CNG768            | Guam                   | 10973                      | 217 |
|                      |                       | CNR114            | Guam                   | 9685                       | 83  |
|                      |                       | CNR510            | Guam                   | 37241                      | 15  |
|                      |                       | CNR864            | Palau                  | 9701                       | 168 |
|                      | CNR909                | Palau             | 34968                  | 8                          |     |
|                      | CNR942                | Palau             | 11236                  | 74                         |     |
|                      | CNS695                | Palau             | 11237                  | 75                         |     |
|                      | CNS103                | Palau             | 9618                   | 6                          |     |
|                      | CNS143                | Palau             | 24476                  | 112                        |     |
|                      | CNS337                | Palau             | 14784                  | 173                        |     |
|                      | CNS801                | Fiji              | 34966                  | 53                         |     |
|                      | CNS860                | Fiji              | 11238                  | 8                          |     |
|                      | CNS969 (DSM 45543)    | Fiji              | 11030 (DSM45543)       | 115                        |     |
|                      | CNS980 (DSM 45544)    | Fiji              | 10584 (DSM45544)       | 162                        |     |
|                      | CNS996                | Fiji              | 10975                  | 184                        |     |
|                      | CNT001                | Fiji              | 9691                   | 110                        |     |
|                      | CNT003                | Fiji              | 9615                   | 30                         |     |
|                      | CNT029                | Fiji              | 9684                   | 171                        |     |
|                      | CNT045                | Fiji              | 10978                  | 188                        |     |
|                      | CNT084                | Fiji              | 9714                   | 8                          |     |
|                      | CNT124                | Fiji              | 10977                  | 102                        |     |
|                      | CNT131                | Fiji              | 9712                   | 135                        |     |
|                      | CNT133 (DSM 45546)    | Fiji              | 10313 (DSM45546)       | 71                         |     |
|                      | CNT138 (DSM 45547)    | Fiji              | 10297 (DSM45547)       | 193                        |     |
|                      | CNT140 (DSM 45548)    | Fiji              | 10602 (DSM45548)       | 178                        |     |
|                      | CNT150 (DSM 45549)    | Fiji              | 10676 (DSM45549)       | 8                          |     |
|                      | CNT403                | Fiji              | 34964                  | 17                         |     |
|                      | CNT569                | Fiji              | 9613                   | 191                        |     |
|                      | CNT584                | Fiji              | 10978                  | 10                         |     |
|                      | CNT603                | Fiji              | 9692                   | 141                        |     |
|                      | CNT609                | Fiji              | 10979                  | 134                        |     |
|                      | CNT796                | Hawaii            | 9689                   | 61                         |     |
|                      | CNT851                | Hawaii            | 10980                  | 98                         |     |
|                      | CNT854                | Hawaii            | 9676                   | 9                          |     |
|                      | CNT865                | Hawaii            | 9617                   | 10                         |     |
|                      | CNY202                | Sea of Cortez     | 15668                  | 134                        |     |
|                      | CNY239                | Fiji              | 14401                  | 122                        |     |
|                      | CNY930                | Sea of Cortez     | 11508                  | 136                        |     |
|                      | CNY931                | Sea of Cortez     | 11509                  | 85                         |     |
|                      | CNY363                | Sea of Cortez     | 35581                  | 10                         |     |
|                      | CNY498                | Puerto Vallarta   | 35607                  | 18                         |     |
|                      | CNY640                | Red Sea/Sponge    | 35578                  | 28                         |     |
|                      | CNY666                | Madeiras          | 35579                  | 9                          |     |
|                      | CNY673                | Madeiras          | 35580                  | 7                          |     |
|                      | CNY703                | Madeiras          | 35581                  | 6                          |     |
|                      | Streptomyces sp.      | CNH891            | Florida Keys           | 11141                      | 282 |
|                      |                       | CNH899            | San Diego              | 9717                       | 174 |
|                      |                       | CNH189            | San Diego              | 9555                       | 405 |
|                      |                       | CNH287            | San Diego              | 14298                      | 182 |
|                      |                       | CNP902            | Sea of Cortez          | 15294                      | 196 |
|                      |                       | CNQ149            | San Diego              | not published              | 218 |
|                      |                       | CNQ329            | San Diego              | 15683                      | 451 |
|                      |                       | CNQ325            | San Diego              | 35130                      | 304 |
|                      |                       | CNQ766            | Guam                   | 10983                      | 200 |
|                      |                       | CNQ865            | Guam                   | 14300                      | 390 |
|                      |                       | CNR698            | Bahamas                | 9744                       | 302 |
|                      |                       | CNS335            | Fiji                   | 10984                      | 327 |
|                      |                       | CNS606            | Fiji                   | 15295                      | 286 |
|                      |                       | CNS615            | Fiji                   | 11142                      | 309 |
| CNS654               |                       | Fiji              | 35124                  | 336                        |     |
| CNT302               |                       | Fiji              | 11025                  | 181                        |     |
| CNT318               |                       | Fiji              | 14397                  | 286                        |     |
| CNT360               |                       | Fiji              | 14399                  | 254                        |     |
| CNT371               |                       | Fiji              | 9718                   | 319                        |     |
| CNT372               |                       | Fiji              | 10985                  | 203                        |     |
| CNX435               |                       | Channel Islands   | 34950                  | 291                        |     |
| CNY228               |                       | Fiji              | 11019                  | 265                        |     |
| CNY243               |                       | Fiji              | 11239                  | 83                         |     |
| TAA040               |                       | Channel Islands   | 14404                  | 146                        |     |
| TAA204               |                       | Channel Islands   | 14405                  | 204                        |     |
| TAA486               |                       | Channel Islands   | 14986                  | 222                        |     |

Table S2: Overview of the compounds detected in this study

| compound name                               | molecular family | gene cluster | analogues         | molecular formula                                                             | m/z measured | m/z theor     | adduct                                            | GNPS score | GNPS Library ID                           | genus                     | species              | strains detected                                                                                                                                                                                                                                                                                                                                                                                                                    | solvent  | media    | solid/liquid |
|---------------------------------------------|------------------|--------------|-------------------|-------------------------------------------------------------------------------|--------------|---------------|---------------------------------------------------|------------|-------------------------------------------|---------------------------|----------------------|-------------------------------------------------------------------------------------------------------------------------------------------------------------------------------------------------------------------------------------------------------------------------------------------------------------------------------------------------------------------------------------------------------------------------------------|----------|----------|--------------|
| actinomycin D                               | actinomycins     | actn         | 3                 | C <sub>26</sub> H <sub>36</sub> N <sub>4</sub> O <sub>16</sub>                | 1255.64      | 1255.64       | [M+H] <sup>+</sup>                                | 0.67       | CCMSLIB0000006871                         | Streptomyces              |                      | CNS654                                                                                                                                                                                                                                                                                                                                                                                                                              | EA,BU,ME | MS,R5    | solid        |
| aminosamide B                               | aminosamides     | amm          | 1 (dimer+ trimer) | C <sub>27</sub> H <sub>36</sub> N <sub>4</sub> O <sub>7</sub> Cl              | 896.14       | 896.14        | [3M+Na] <sup>+</sup>                              | 0.87       | CCMSLIB00000223962                        | Streptomyces              |                      | CNS615                                                                                                                                                                                                                                                                                                                                                                                                                              | EA,ME    | A1,R5    | solid        |
| antimycin A1                                | antimycins       | ant          | 9                 | C <sub>26</sub> H <sub>36</sub> N <sub>4</sub> O <sub>9</sub>                 | 549.28       | 549.282       | [M+H] <sup>+</sup>                                | 0.76       | CCMSLIB00000479755                        | Streptomyces              |                      | CNQ329,CNY228                                                                                                                                                                                                                                                                                                                                                                                                                       | EA,BU,ME | R5       | solid        |
| arenicolide A                               | arenicolides     | PKS28        | 7                 | C <sub>20</sub> H <sub>22</sub> O <sub>12</sub>                               | 827.49       | 827.492       | [M+Na] <sup>+</sup>                               | 0.91       | CCMSLIB00000001678                        | Salinispora               | arenicola,pacifica   | CNQ748,CNT138                                                                                                                                                                                                                                                                                                                                                                                                                       | EA       | A1       | liquid       |
| arenimycin A                                | arenimycins      | arn          | 2                 | C <sub>23</sub> H <sub>30</sub> NO <sub>14</sub>                              | 668.20       | 668.197       | [M+H] <sup>+</sup>                                | 0.8        | CCMSLIB000000081200                       | Salinispora               | arenicola            | CNS527                                                                                                                                                                                                                                                                                                                                                                                                                              | EA,BU    | A1       | solid        |
| arenimycin B                                | arenimycins      | arn          | 2                 | C <sub>21</sub> H <sub>26</sub> N <sub>2</sub> O <sub>15</sub>                | 809.31       | 809.312       | [M+H] <sup>+</sup>                                | 0.83       | CCMSLIB000000081201                       | Salinispora               | arenicola            | CNS527                                                                                                                                                                                                                                                                                                                                                                                                                              | EA,BU,ME | A1       | solid        |
| alteramide B                                | alteramides      |              | 6                 | C <sub>26</sub> H <sub>36</sub> N <sub>4</sub> O <sub>2</sub>                 | 497.30       | 495.278       | [M+H] <sup>+</sup>                                | 0.62       | CCMSLIB00000077250                        | Streptomyces              |                      | CNQ329,CNS654                                                                                                                                                                                                                                                                                                                                                                                                                       | EA,BU,ME | R5       | solid        |
| cyclomarlin A                               | cyclomarins      | cym          | 6                 | C <sub>26</sub> H <sub>36</sub> N <sub>4</sub> O <sub>11</sub>                | 1025.61      | 1025.608      | [M-H] <sub>2</sub> O <sub>2</sub> HI <sup>+</sup> | 0.74       | CCMSLIB00000001554                        | Salinispora               | arenicola            | CNS205                                                                                                                                                                                                                                                                                                                                                                                                                              | EA,BU,ME | A1       | solid/liquid |
| cyclomarlin D                               | cyclomarins      | cym          | 6                 | C <sub>26</sub> H <sub>36</sub> N <sub>4</sub> O <sub>10</sub>                | 1035.59      | 1035.59       | [M+Na] <sup>+</sup>                               | 0.92       | CCMSLIB00000001614                        | Salinispora               | arenicola            | CNS205                                                                                                                                                                                                                                                                                                                                                                                                                              | EA       | A1       | liquid       |
| acyldeferoxamine-C13 (promicroferrioxamine) | deferoxamines    | des          | >50               | C <sub>27</sub> H <sub>37</sub> N <sub>5</sub> O <sub>9</sub>                 | 729.55       | 729.548       | [M+H] <sup>+</sup>                                | 0.66       | CCMSLIB00000072053                        | Salinispora               | arenicola            | CNS991,CNY231                                                                                                                                                                                                                                                                                                                                                                                                                       | BU       | A1       | solid        |
| acyldeferoxamine-C15                        | deferoxamines    | des          | >50               | C <sub>29</sub> H <sub>37</sub> N <sub>5</sub> O <sub>9</sub>                 | 757.58       | 757.578       | [M+H] <sup>+</sup>                                | 0.66       | CCMSLIB00000072056                        | Salinispora               | arenicola            | CNS991,CNY231                                                                                                                                                                                                                                                                                                                                                                                                                       | BU       | A1       | solid        |
| deferoxamine B                              | deferoxamines    | des          | >50               | C <sub>29</sub> H <sub>36</sub> N <sub>5</sub> O <sub>9</sub>                 | 561.36       | 561.36        | [M+H] <sup>+</sup>                                | 0.85       | CCMSLIB00000072100                        | Salinispora, Streptomyces | arenicola, tropica   | CNS440,CNH643,CNH713,CNS325,CNS673,CNS744,CNS820,CNS991,CNY679,CNT302,CNY228,CNT372,CNR698,CNS15,CNQ329,CNH189,CNQ766,CNP082,CNS025                                                                                                                                                                                                                                                                                                 | EA,BU,ME | A1,MS,R5 | solid        |
| deferoxamine E                              | deferoxamines    | des          | >50               | C <sub>27</sub> H <sub>36</sub> N <sub>5</sub> O <sub>9</sub>                 | 601.36       | 601.36,623.33 | [M+H] <sup>+</sup><br>[M+Na] <sup>+</sup>         | 0.96       | CCMSLIB00000001621,<br>CCMSLIB00000001622 | Salinispora, Streptomyces | arenicola,pacifica   | CNH964,CNS673,CNS991,CNS996,CNT798,CNT850,CNY679,CNT302,TA04,CNY228,TA448,6,CNT318,CNR698,CNS615,CNQ329,CNH189,CNT360,CNS654                                                                                                                                                                                                                                                                                                        | EA,BU,ME | A1,MS,R5 | solid        |
| desmethylerythronidamine                    | deferoxamines    | des          | >50               | C <sub>28</sub> H <sub>36</sub> N <sub>5</sub> O <sub>9</sub>                 | 586.5        | 587.339       | [M+H] <sup>+</sup>                                | 0.72       | CCMSLIB00000079903                        | Salinispora, Streptomyces | arenicola            | CNH964,CNS673,CNS991,TA04,CNY228,CNT372,TA448,CNT318,CNQ329,CNH189,CNT360,CNQ149,CNS654                                                                                                                                                                                                                                                                                                                                             | EA,BU,ME | A1,MS,R5 | solid        |
| enterocin                                   | enterocins       | enc          | 3                 | C <sub>27</sub> H <sub>37</sub> O <sub>13</sub>                               | 445.11       | 445.113       | [M+H] <sup>+</sup>                                | 0.77       | CCMSLIB00000001645                        | Streptomyces              |                      | CNT318                                                                                                                                                                                                                                                                                                                                                                                                                              | EA,BU,ME | A1,R5    | solid        |
| enterocin-8desoxy                           | enterocins       | enc          | 3                 | C <sub>27</sub> H <sub>37</sub> O <sub>13</sub>                               | 429.12       | 429.118       | [M+H] <sup>+</sup>                                | 0.66       | CCMSLIB00000001661                        | Streptomyces              |                      | CNT318                                                                                                                                                                                                                                                                                                                                                                                                                              | EA,BU,ME | MS,R5    | solid        |
| lomaiviticin A                              | lomaiviticins    | lom          | 6                 | C <sub>16</sub> H <sub>16</sub> N <sub>4</sub> O <sub>24</sub>                | 683.27       | 683.268       | [M+H] <sup>2+</sup>                               | 0.92       | CCMSLIB000000081199                       | Salinispora               | pacifica, tropica    | CNH898,CNT148,CNT250,CNT569                                                                                                                                                                                                                                                                                                                                                                                                         | EA       | A1       | solid        |
| lomaiviticin C                              | lomaiviticins    | lom          | 6                 | C <sub>16</sub> H <sub>16</sub> N <sub>4</sub> O <sub>24</sub>                | 670.27       | 670.274       | [M+H] <sup>2+</sup>                               | 0.94       | CCMSLIB000000081196                       | Salinispora               | pacifica, tropica    | CNB440,CNB476,CNB536,CNH898,CNS055,CNT148,CNT250,CNT569                                                                                                                                                                                                                                                                                                                                                                             | EA,BU,ME | A1       | solid/liquid |
| lomaiviticin D                              | lomaiviticins    | lom          | 6                 | C <sub>16</sub> H <sub>16</sub> N <sub>4</sub> O <sub>24</sub>                | 677.41       | 677.281       | [M+H] <sup>2+</sup>                               | 0.94       | CCMSLIB000000081197                       | Salinispora               | pacifica, tropica    | CNB476,CNB536,CNH898,CNT148,CNT569                                                                                                                                                                                                                                                                                                                                                                                                  | EA,BU,ME | A1       | solid        |
| retimycin A                                 | retimycins       | rtm          | 3                 | C <sub>26</sub> H <sub>36</sub> N <sub>4</sub> O <sub>15</sub> S <sub>2</sub> | 1171.42      | 1171.422      | [M+H] <sup>+</sup>                                | 0.86       | CCMSLIB00000223995                        | Salinispora               | arenicola            | CNT005                                                                                                                                                                                                                                                                                                                                                                                                                              | EA       | A1       | liquid       |
| rifamycin S                                 | rifamycins       | rf           | 26                | C <sub>27</sub> H <sub>36</sub> NO <sub>12</sub>                              | 696.28       | 696.302       | [M+H] <sup>+</sup>                                | 0.76       | CCMSLIB00000001653                        | Salinispora               | arenicola            | CNT005,CNX814                                                                                                                                                                                                                                                                                                                                                                                                                       | EA       | A1       | solid/liquid |
| rifamycin W                                 | rifamycins       | rf           | 26                | C <sub>26</sub> H <sub>36</sub> NO <sub>11</sub>                              | 656.31       | 656.306       | [M+H] <sup>+</sup>                                | 0.73       | CCMSLIB00000001635                        | Salinispora, Streptomyces | arenicola            | CNH646,CNH941,CNS205,CNS991,CNT005,CNT799,CNT850,CNY234,CNY260,CNQ149,CNH193,CNT005,CNT798,CNT849,CNX814,CNQ149                                                                                                                                                                                                                                                                                                                     | EA,BU,ME | A1,MS    | solid/liquid |
| rosamicin                                   | rosamicins       | spr          | 15                | C <sub>31</sub> H <sub>51</sub> NO <sub>5</sub>                               | 582.36       | 582.364       | [M+H] <sup>+</sup>                                | 0.85       | CCMSLIB00000223877                        | Salinispora, Streptomyces | pacifica             | CNS237,CNT609                                                                                                                                                                                                                                                                                                                                                                                                                       | BU       | A1       | solid        |
| 21-hydroxyrosamicin                         | rosamicins       | spr          | 15                | C <sub>31</sub> H <sub>51</sub> NO <sub>10</sub>                              | 598.35       | 598.359       | [M+H] <sup>+</sup>                                | 0.93       | CCMSLIB000000331536                       | Salinispora, Streptomyces | pacifica             | CNS237,CNT609,CNT360                                                                                                                                                                                                                                                                                                                                                                                                                | EA,BU,ME | A1       | solid        |
| 18-dihydro-14-hydroxyrosamicin              | rosamicins       | spr          | 15                | C <sub>31</sub> H <sub>53</sub> NO <sub>10</sub>                              | 600.43       | 600.374       | [M+H] <sup>+</sup>                                | 0.86       | CCMSLIB000000331538                       | Salinispora, Streptomyces | pacifica             | CNS237,CNT609,CNT360                                                                                                                                                                                                                                                                                                                                                                                                                | EA,BU,ME | A1       | solid        |
| 18-dihydro-21-hydroxyrosamicin              | rosamicins       | spr          | 15                | C <sub>31</sub> H <sub>53</sub> NO <sub>10</sub>                              | 600.38       | 600.374       | [M+H] <sup>+</sup>                                | 0.84       | CCMSLIB000000331539                       | Salinispora, Streptomyces | pacifica             | CNS237,CNT609,CNT360                                                                                                                                                                                                                                                                                                                                                                                                                | EA,BU,ME | A1       | solid        |
| 14-hydroxyrosamicin                         | rosamicins       | spr          | 15                | C <sub>31</sub> H <sub>51</sub> NO <sub>10</sub>                              | 598.36       | 598.359       | [M+H] <sup>+</sup>                                | 0.92       | CCMSLIB000000331537                       | Salinispora, Streptomyces | pacifica             | CNS237,CNT084,CNT133,CNT609,CNY646,CNT360                                                                                                                                                                                                                                                                                                                                                                                           | EA,BU,ME | A1       | solid        |
| salinamide A                                | salinamides      | sfn          | 7                 | C <sub>21</sub> H <sub>26</sub> N <sub>4</sub> O <sub>15</sub>                | 1020.49      | 1020.493      | [M+H] <sup>+</sup>                                | 0.61       | CCMSLIB00000223957                        | Streptomyces              |                      | CNB091                                                                                                                                                                                                                                                                                                                                                                                                                              | EA,BU,ME | A1,MS    | solid        |
| salinamide B                                | salinamides      | sfn          | 7                 | C <sub>21</sub> H <sub>26</sub> N <sub>4</sub> O <sub>15</sub> Cl             | 1056.47      | 1056.47       | [M+H] <sup>+</sup>                                | 0.67       | CCMSLIB00000223958                        | Streptomyces              |                      | CNB091                                                                                                                                                                                                                                                                                                                                                                                                                              | EA,BU,ME | A1       | solid        |
| salinamide E                                | salinamides      | sfn          | 7                 | C <sub>22</sub> H <sub>26</sub> N <sub>4</sub> O <sub>12</sub>                | 855.45       | 855.45        | [M+H] <sup>+</sup>                                | 0.79       | CCMSLIB00000223959                        | Streptomyces              |                      | CNT287                                                                                                                                                                                                                                                                                                                                                                                                                              | BU       | A1       | solid        |
| desmethylsalinamide E                       | salinamides      | sfn          | 7                 | C <sub>22</sub> H <sub>26</sub> N <sub>4</sub> O <sub>12</sub>                | 841.44       | 841.436       | [M+H] <sup>+</sup>                                | 0.76       | CCMSLIB00000223960                        | Streptomyces              |                      | CNH287,CNB091                                                                                                                                                                                                                                                                                                                                                                                                                       | EA,BU    | A1,MS    | solid        |
| staurosporine                               | staurosporines   | sta          | 11                | C <sub>28</sub> H <sub>38</sub> N <sub>4</sub> O <sub>3</sub>                 | 467.20       | 467.208       | [M+H] <sup>+</sup>                                | 0.97       | CCMSLIB00000001655                        | Salinispora               | arenicola, pacifica, | CNB458,CNS527,CNH643,CNH646,CNH713,CNH718,CNH877,CNH905,CNH941,CNH962,CNH963,CNH964,CNH996,CNP105,CNP193,CNT748,CNQ884,CNR107,CNR425,CNR921,CNS051,CNS205,CNS243,CNS296,CNS299,CNS325,CNS342,CNS673,CNS744,CNS820,CNS848,CNS863,CNS991,CNS996,CNT005,CNT029,CNT138,CNT403,CNT798,CNT799,CNT800,CNT849,CNT850,CNT482,CNX814,CNX891,CNY011,CNY230,CNY231,CNY234,CNY237,CNY244,CNY256,CNY260,CNY280,CNY281,CNY282,CNY486,CNY679,CNY694 | EA,BU,ME | A1       | solid/liquid |
| staurosporine-7-OH                          | staurosporines   | sta          | 11                | C <sub>28</sub> H <sub>38</sub> N <sub>4</sub> O <sub>4</sub>                 | 483.20       | 483.203       | [M+H] <sup>+</sup>                                | 0.88       | CCMSLIB00000001672                        | Salinispora, Streptomyces | arenicola, pacifica, | CNB458,CNS527,CNH643,CNH646,CNH713,CNH718,CNH877,CNH905,CNH941,CNH962,CNH963,CNH964,CNH996,CNP105,CNP193,CNQ748,CNQ884,CNR107,CNR425,CNR921,CNS051,CNS205,CNS243,CNS296,CNS299,CNS325,CNS342,CNS673,CNS744,CNS820,CNS848,CNS863,CNS991,CNT005,CNT124,CNT138,CNT584,CNT798,CNT799,CNT849,CNT850,CNT857,CNX482,CNX814,CNX891,CNY011,CNY202,CNY230,CNY231,CNY234,CNY237,CNY244,CNY256,CNY260,CNY280,CNY282,CNY486,CNY679,CNY694,CNQ149 | EA,BU,ME | A1,MS    | solid/liquid |

**Table S3:** Information about detected staurosporine analogues in the ISP2 time course network (see Figure 4) (Barrabee, Horan et al. 1997, Park, Abdel-Azeem et al. 2013).

| m/z (Da)<br>measured | m/z (Da)<br>theor | error<br>(ppm) | exact<br>mass | molecular<br>formula                                          | spectral counts after |      |      | name               | characterized                                     |
|----------------------|-------------------|----------------|---------------|---------------------------------------------------------------|-----------------------|------|------|--------------------|---------------------------------------------------|
|                      |                   |                |               |                                                               | 14 d                  | 21 d | 28 d |                    |                                                   |
| 467.205              | 467.208           | -6.4           | 466.2         | C <sub>28</sub> H <sub>26</sub> N <sub>4</sub> O <sub>3</sub> | 3                     | 4    | 5    | staurosporine      |                                                   |
| 481.187              | 481.188           | -2.1           | 480.18        | C <sub>28</sub> H <sub>24</sub> N <sub>4</sub> O <sub>4</sub> | 1                     | 1    | 1    | oxo-STA            | RK-1409 (7-oxo-STA)                               |
| 481.221              | 481.224           | -6.2           | 480.216       | C <sub>29</sub> H <sub>28</sub> N <sub>4</sub> O <sub>3</sub> | 2                     | 6    | 5    | Methyl-STA         | N-methyl-STA                                      |
| 483.2                | 483.203           | -6.2           | 482.195       | C <sub>28</sub> H <sub>26</sub> N <sub>4</sub> O <sub>4</sub> | 6                     | 7    | 9    | hydroxy-STA        | 7,11 and 15-hydroxy-STA                           |
| 495.199              | 495.203           | -7.7           | 494.195       | C <sub>29</sub> H <sub>26</sub> N <sub>4</sub> O <sub>4</sub> | 0                     | 0    | 3    |                    | <i>Saccharothrix</i> STR15                        |
| 497.216              | 497.218           | -4.0           | 496.211       | C <sub>29</sub> H <sub>28</sub> N <sub>4</sub> O <sub>4</sub> | 6                     | 7    | 12   | methyl-hydroxy-STA | TAN-999 (10-methoxy-STA),4-N-methyl-5-hydroxy-STA |
| 499.201              | 499.198           | 6.0            | 498.19        | C <sub>28</sub> H <sub>26</sub> N <sub>4</sub> O <sub>5</sub> | 0                     | 3    | 10   | dihydroxy-STA      | 3,11-dihydroxy-STA                                |
| 511.196              | 511.198           | -3.9           | 510.19        | C <sub>29</sub> H <sub>26</sub> N <sub>4</sub> O <sub>5</sub> | 0                     | 0    | 5    |                    | <i>Saccharothrix</i> STR12                        |
